# Supplementary material for: Expression of Concern: ZEB2 Mediates Multiple Pathways Regulating Cell Proliferation, Migration, Invasion, and Apoptosis in Glioma
Source: PubMed Central journal article supplement (PMC7112199; doi:10.1371/journal.pone.0231386), 2020-04-01
Supplement: pone.0231386.s001.pdf [file pone.0231386.s001.pdf]

Figure 1. STR profiles of U87 cell line

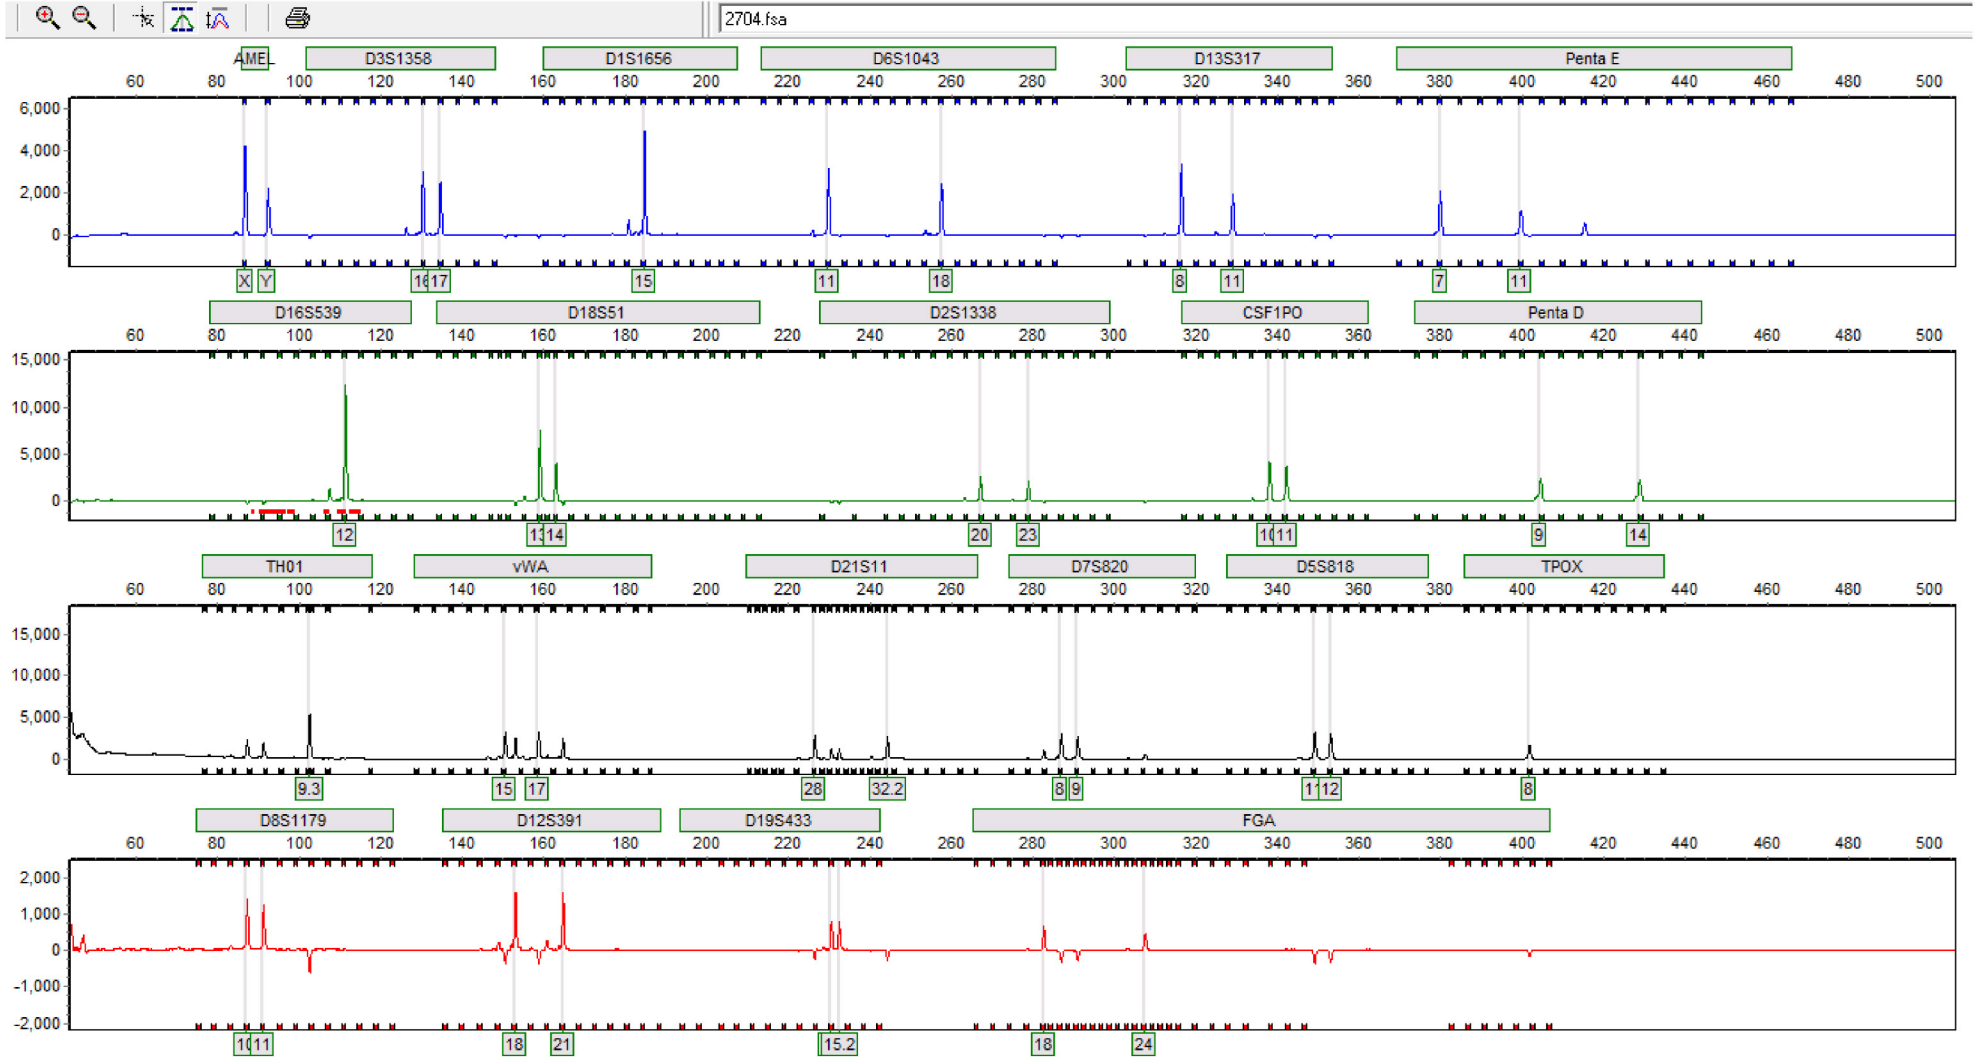

Table 1. STR profiles of U87 cell line

| 21      | Allele1 | Allele2 |
|---------|---------|---------|
| AMEL    | X       | Y       |
| D3S1358 | 16      | 17      |
| D1S1656 | 15      |         |
| D6S1043 | 11      | 18      |
| D13S317 | 8       | 11      |
| Penta E | 7       | 11      |
| D16S539 | 12      |         |
| D18S51  | 13      | 14      |
| D2S1338 | 20      | 23      |
| CSF1PO  | 10      | 11      |
| Penta D | 9       | 14      |
| TH01    | 9.3     |         |
| vWA     | 15      | 17      |
| D21S11  | 28      | 32.2    |
| D7S820  | 8       | 9       |
| D5S818  | 11      | 12      |
| TPOX    | 8       |         |
| D8S1179 | 10      | 11      |
| D12S391 | 18      | 21      |
| D19S433 | 15.2    |         |
| FGA     | 18      | 24      |

Figure 2. Search result in ATCC database

## SEARCH THE STR DATABASE

As part of our continuing efforts to characterize and authenticate the cell lines in the Cell Biology collection, ATCC has developed a comprehensive database of short tandem repeat (STR) DNA profiles for all of our human cell lines. [View our brief tutorial before starting.](#)

1. [STR Profiling Analysis](#)
2. [Matching Algorithm](#)
3. [Interrogating the Database](#)

---

Showing 1 - 3 Of 3 Page Size: 100 ▾

| Add to Cart              | %Match | ATCC® Number | Designation                             | D5S818 | D13S317 | D7S820 | D16S539 | vWA   | TH01  | AMEL | TPOX | CSF1PO |
|--------------------------|--------|--------------|-----------------------------------------|--------|---------|--------|---------|-------|-------|------|------|--------|
| <input type="checkbox"/> | 100.0  | HTB-14       | U-87<br>MGGlioblastoma-AstrocytomaHuman | 11,12  | 8,11    | 8,9    | 12      | 15,17 | 9.3   | X,Y  | 8    | 10,11  |
| <input type="checkbox"/> | 83.0   | CRL-5842     | NCI-H774Small Cell Lung CancerHuman     | 11     | 8       | 9,11   | 12      | 15,17 | 6,9,3 | X    | 8    | 10     |
| <input type="checkbox"/> | 82.0   | HTB-183      | NCI-H661Lung CarcinomaHuman             | 11     | 11      | 8,10   | 12      | 17    | 8     | X,Y  | 8    | 10     |

Add to Cart
Export to Excel

Figure 3. Search result in DSMZ database

| Result of STR matching analysis by your data.                 |          |                          |              |             |            |              |              |                |            |            |              |         |
|---------------------------------------------------------------|----------|--------------------------|--------------|-------------|------------|--------------|--------------|----------------|------------|------------|--------------|---------|
| - DSMZ Profile Database -                                     |          |                          |              |             |            |              |              |                |            |            |              |         |
| A graphical presentation is shown at the bottom of this page. |          |                          |              |             |            |              |              |                |            |            |              |         |
| EV                                                            | Cell No. | Cell name                | Locus names  |             |            |              |              |                |            |            |              | Figures |
|                                                               |          |                          | D5S818       | D13S317     | D7S820     | D16S539      | VWA          | TH01           | AM         | TPOX       | CSF1PO       |         |
|                                                               |          | <i>Query (Your Cell)</i> | <i>11,12</i> | <i>8,11</i> | <i>8,9</i> | <i>12,12</i> | <i>15,17</i> | <i>9,3,9,3</i> | <i>X,Y</i> | <i>8,8</i> | <i>10,11</i> |         |
| 0.94(34/36)                                                   | HTB-14   | U-87MG                   | 11,12        | 8,11        | 8,9        | 12,12        | 15,17        | 9,3,9,3        | X,X        | 8,8        | 10,11        | -       |

Figure 4. Authentication of the species of the sample

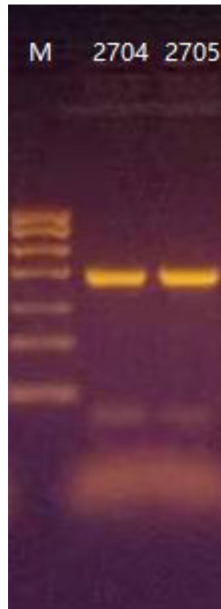

M: Marker. As the size of 700, 600, 500, 400, 300, 200 and 100bp from up to down.

Nine species are checked, as follow: *Homo sapiens* 391bp, *Cricetulus griseus* 315bp, *Macaca mulatta* 287bp, *Cercopithecus aethiops* 222bp, *Rattus norvegicus* 196bp, *Canis familiaris* 172bp, *Mus musculus* 150bp, *Bos Taurus* 102bp, IC 70bp

JD2704: The sample. The band size is 391bp which matches the size of human.
